# Supplementary material for: Arabidopsis OSMOTIN 34 Functions in the ABA Signaling Pathway and Is Regulated by Proteolysis
Source: MDPI journal article supplement (doi:10.3390/ijms22157915), 2021-07-24
Supplement: s1 [file s1]

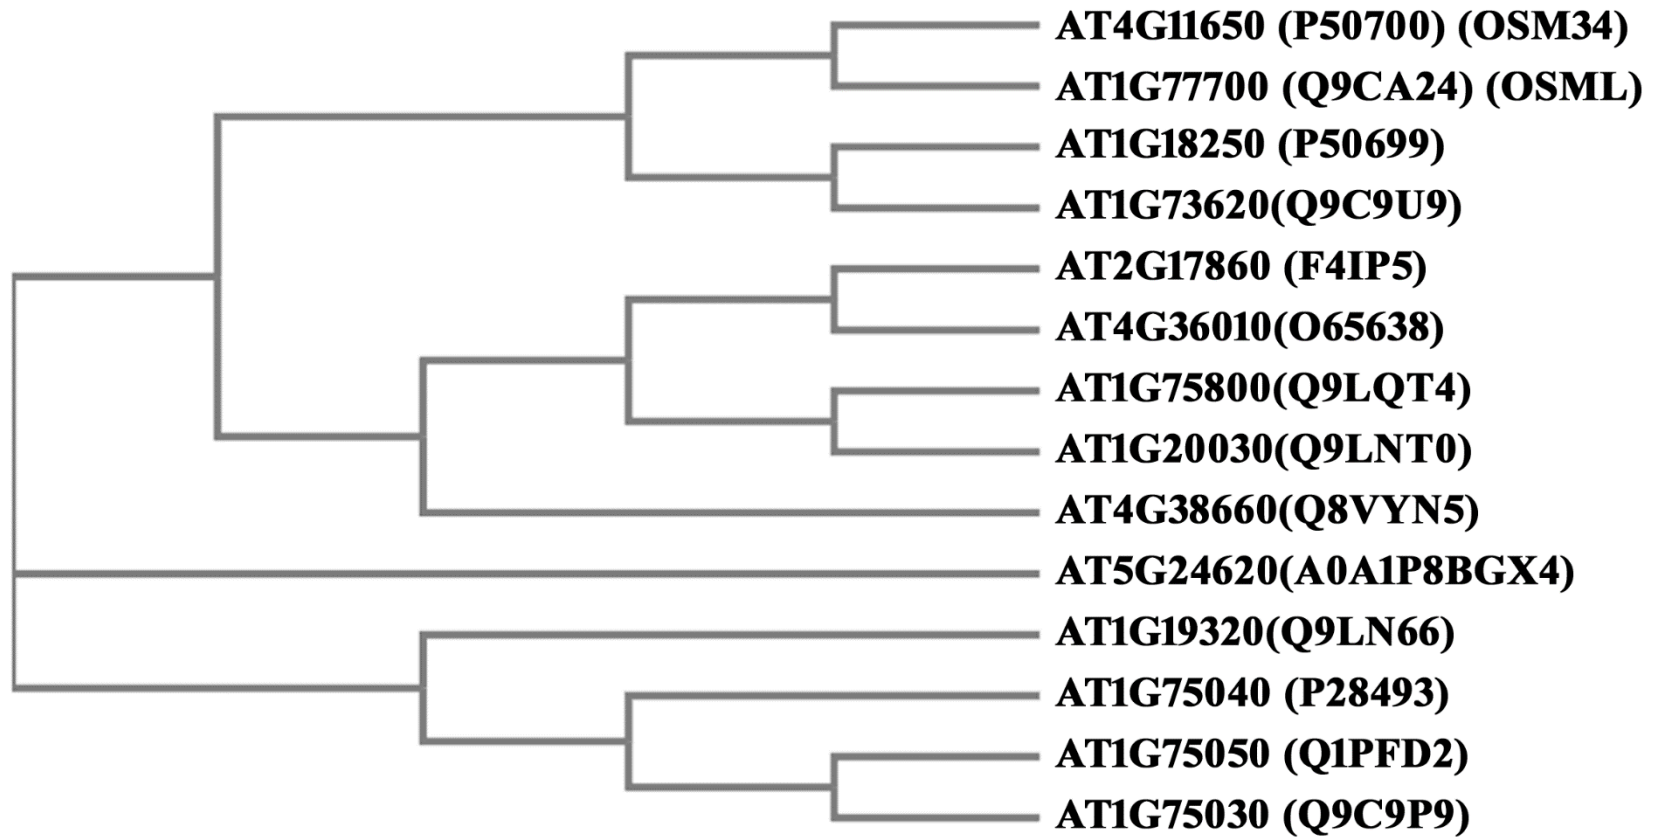

**Figure S1. Phylogenetic tree of OSM34 and similar proteins** Protein sequences were aligned using Clustal Omega [1]. Each protein sequence was obtained from the Uniprot database. AGI (Protein ID)

1) Madeira, F.; Park, Y.M.; Lee, J.; Buso, N.; Gur, T.; Madhusoodanan, N.; Basutkar, P.; Tivey, A.R.N.; Potter, S.C.; Finn, R.D.; *et al.* The EMBL-EBI search and sequence analysis tools APIs in 2019. *Nucleic Acids Res*, **2019**, 47, W636-W641, doi:10.1093/nar/gkz268.

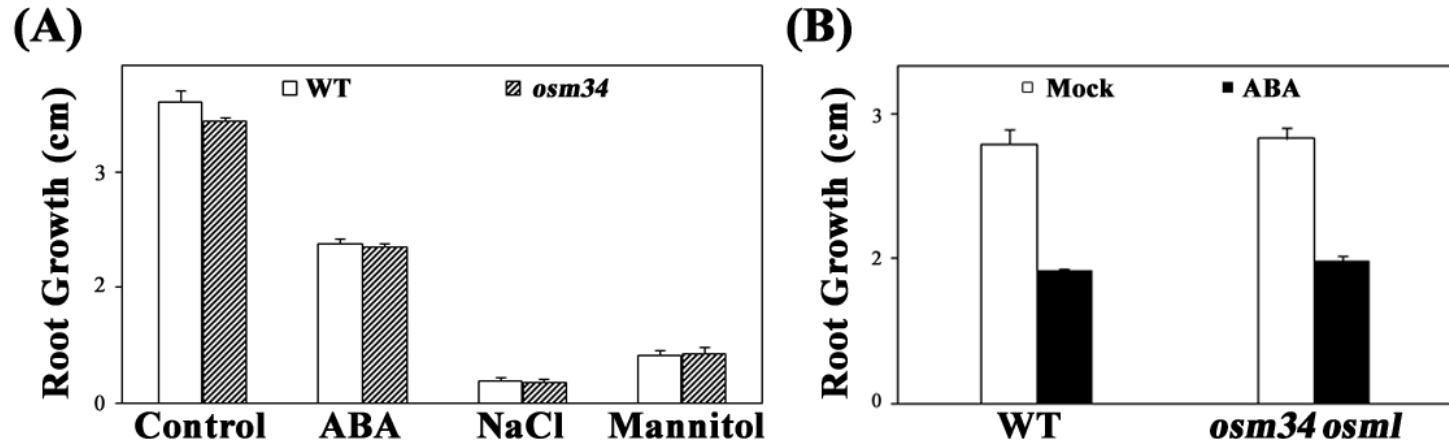

**Figure S2. Root growth inhibition caused by abiotic stresses was not affected by the mutation in *OSM34*** (A) Five-day-old seedlings of wildtype (Col-0) and *osm34* were transferred to each media containing 30  $\mu$ M ABA, 150 mM NaCl, and 300 mM Mannitol, and grown for 3 days. (B) Five-day-old seedlings of wildtype (Col-0) and *osm34 osml* were transferred to media containing 30  $\mu$ M ABA and grown for 3 days.

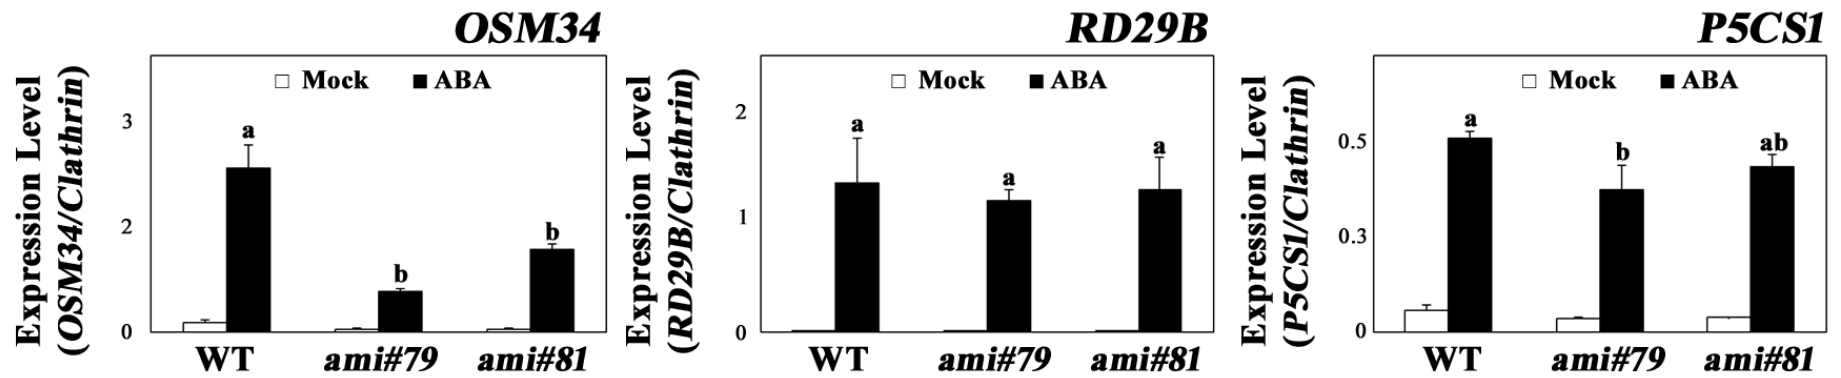

**Figure S3. The *OSM34* knock-down lines generated by an *amiRNA* approach shows reduced ABA-induction of gene expression**

Homozygous T3 generations of *amiOSM34* #79/81 were used for quantitative PCR analyses. Six-day-old seedlings were treated with 50  $\mu$ M ABA for 24h. a/ab/b indicate different groups based on the one-way ANOVA Duncan post-hoc analyses ( $p < 0.05$ ).

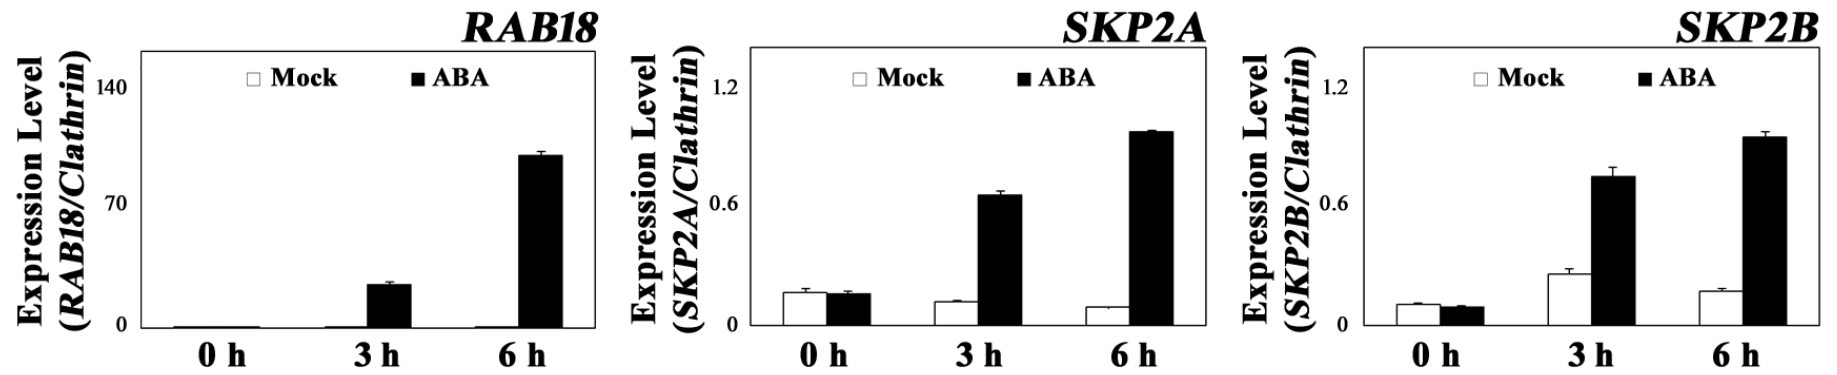

**Figure S4. F-Box genes *SKP2A* and *SKP2B* are transcriptionally induced by ABA treatment**

The expressions of ABA-responsive genes *RAB18*, *SKP2A*, and *SKP2B* were quantified using quantitative PCR analyses. Eight-day-old seedlings of wildtype (Col-0) were treated with 50  $\mu$ M ABA for the indicated time (0/3/6 hours).
