# Supplementary material for: Arabidopsis OSMOTIN 34 Functions in the ABA Signaling Pathway and Is Regulated by Proteolysis
Source: Int J Mol Sci. 2021 Jul 24;22(15):7915. doi: 10.3390/ijms22157915 (PMC8347876; doi:10.3390/ijms22157915)
Supplement: Supplementary file 1 [file ijms-22-07915-s001.zip › Supplementary Table S1.xlsx]

## Sheet: Primer List
Supplementary Table 1. Primer List
AGI	Gene			Sequences	Note
AT4G11650	OSM34	I miR-s	5'	gaTTGGTGCAAGTGAAAGTGCTCtctctcttttgtattcc	artificial miRNA
		II miR-a	3'	gaGAGCACTTTCACTTGCACCAAtcaaagagaatcaatga
		III miR*s	5'	gaGAACACTTTCACTAGCACCATtcacaggtcgtgatatg
		IV miR*a	3'	gaATGGTGCTAGTGAAAGTGTTCtctacatatatattcct
		A-gate-BP	5'	GGGGACAAGTTTGTACAAAAAAGCAGGCTGAATTCCTGCAGCCCcaaacacacg
		B-gate-BP	3'	GGGGACCACTTTGTACAAGAAAGCTGGGTGGATCCCCCcatggcgatgcctta
AT4G11650	OSM34	guide RNA1	5'	gattGTGTGGGCTGCCGCAAGCCC	CRISPR/Cas9
			3'	aaacGGGCTTGCGGCAGCCCACAC
		guide RNA2	5'	gattGTGGAGGCTAGATGTCGCGGC
			3'	aaacGCCGCGACATCTAGCCTCCAC
		U6pro	5'	GCCGGTACCCATTCGGAGTTTTTGTAT
		U6term	3'	TATGAATTCGCCATTTGTCTGCAGAATTG
		Cas9	5'	AGAAGATACACCAGACGGAAG
			3'	CAGGCCATTCTTCTTCTCGCC
AT4G11650	OSM34	124-735 bp	5'	gcgagatctGGAGGTGGCCGACGTCTAG	Yeast Two Hybrid
			3'	gcgctcgagTTAATTCTCCTCGGTGACCATC
AT1G21410	SKP2A	1-1083 bp	5'	TAAgaattcATGGTGATGGGAGGAGAAG
			3'	acgcGTCGACttaATGAGCAGGATGAGGAA
AT1G77700	OSML		5'	ATGGACCGAACAATTGAGATT	SALK_013068 Genotyping PCR 5'/3' and 3'/LB
			3'	TGAATTCAGCTAGTGAAGCTG
			LB	TGGTTCACGTAGTGGGCCATCG
AT4G11650	OSM34		5'	CTCTCAACACGTTTGGACATTGTC	quantitative real-time PCR assay
			3'	TTGAACCAATTCAACAACTTAGAC
AT3G18780	ACT2		5'	CTCATGAAGATCCTTACAG	quantitative real-time PCR assay
			3'	CTTTCAGGTGGTGCAACGAC
AT4G24550	Clathrin		5'	ATACGCGCTGAGTTCCC	quantitative real-time PCR assay
			3'	CTGACTGGCCCTGCTT
AT5G66400	RAB18		5'	TTCACCGCTCCGGATCTGGAT	quantitative real-time PCR assay
			3'	GCTCATTACACACTCATGTAAGTA
AT4G26080	ABI1		5'	CATCTTCGTCGCTAACTGCGGTGA	quantitative real-time PCR assay
			3'	TGGATCTCGACATGGCGAGAACAC
AT2G39800	P5CS1		5'	TTCTTCTGAGCGATGTTGAAGGTC	quantitative real-time PCR assay
			3'	CAGCAACTGCCATGTCACGAGCAT
AT5G52300	RD29B		5'	TGGGAAGAGACTTACCGACGGGAACTCATG	quantitative real-time PCR assay
			3'	CGGAGAGAGGTAGCTTTGTCATCACCGTTG
AT1G21410	SKP2A		5'	TGGCTGCACTTCATTCAGCGA	quantitative real-time PCR assay
			3'	GCTAGAGCTACCACACTCTC
AT1G77000	SKP2B		5'	GTATCTGACAATACATTGCAG	quantitative real-time PCR assay
			3'	GCATTGACTAATGTTAAGGCT
